1 **Love, not food, could have paved the path for dog domestication – A lesson from free-**  
2 **ranging dogs**

3 Debottam Bhattacharjee<sup>1</sup>, Shubhra Sau<sup>1</sup>, Jayjit Das<sup>1</sup> and Anindita Bhadra<sup>1\*</sup>

4

5 **Affiliations:**

6 <sup>1</sup> Department of Biological Sciences, Indian Institute of Science Education and Research

7 Kolkata, Nadia, West Bengal, India

8

9 **\*Corresponding author**

10 Behaviour and Ecology Lab, Department of Biological Sciences,

11 Indian Institute of Science Education and Research Kolkata

12 Mohanpur Campus, Mohanpur,

13 PIN 741246, West Bengal, INDIA

14 *tel.* +91-33 6634 0000 ext 1223

15 *fax* +91-33-25873020

16 E-mail: [abhadra@iiserkol.ac.in](mailto:abhadra@iiserkol.ac.in) (AB)

17

18

19

20

## 21 **Abstract**

22 Dogs (*Canis lupus familiaris*) are the first species to have been domesticated, and unlike other  
23 domesticated species, they have developed a special bonding with their owners. The ability to  
24 respond to human gestures and language is a key factor in the socio-cognitive abilities of dogs  
25 that have made them our best friend. Free-ranging dogs provide an excellent model system for  
26 understanding the dog domestication process. In India, free-ranging dogs occupy every possible  
27 human habitation, and interact with humans regularly. They scavenge among garbage, beg for  
28 food from humans, give birth in dens close to human habitations, and establish social bonds with  
29 people. However, there is ample dog-human conflict on the streets, leading to morbidity and  
30 mortality. Hence the ability to assess an unfamiliar human before establishing physical contact  
31 could be adaptive for dogs especially in the urban environment. We tested a total of 103 adult  
32 free-ranging dogs to investigate their response to immediate and long-term food and social  
33 rewards. The dogs were provided a choice of obtaining a food reward either from the hand or the  
34 ground. The dogs avoided making physical contact with the unfamiliar human. While immediate  
35 rewards were not effective in changing this response, the long-term test showed a strong effect of  
36 the social reward on the response of dogs. Our results revealed that dogs tend to build trust based  
37 on affection, and not food rewards. This study provides significant insights into nuances of the  
38 dynamics that could have paved the path to dog domestication.

39 **Keywords:** Free-ranging dogs, Social interaction, Petting, Food reward, Domestication.

## 40 **Introduction**

41 Living in close proximity with humans can have several adaptive advantages for animals, while  
42 posing challenges for survival at the same time. Human habitations can be good sources for food,

43 shelter and protection; and many species of animals, from insects to mammals are known to have  
44 adapted to co-habiting with humans, as pests, parasites, commensals and domesticates (Castillo  
45 et al., 2003; Pocock et al., 2004; Vannier-Santos and Lenzi, 2011). The changing landscape of  
46 human habitation, from more rural to more urban over the past decades has led to an increasing  
47 interest in urban ecosystems (Alberti et al., 2008; McIntyre and Hope, 2008; Pickett et al., 2008)  
48 . Species that adapt to the urban environment present interesting case studies to understand how  
49 they resolve issues of conflict with humans while exploiting new niches created in these human  
50 dominated landscapes. This question is all the more interesting for species like birds and  
51 mammals, in which decision making might be influenced by their experiences from interactions  
52 with humans in the urban space (Ditchkoff et al., 2006; Maklakov et al., 2011; White et al.,  
53 2005).

54 Most of the species present in urban areas are generalists, omnivorous and have higher tolerance  
55 to human disturbance (Grimm et al., 2008; Liz?e et al., 2011; Shochat et al., 2006). Successful  
56 urban species typically show plasticity in behaviours that help them to adjust to major  
57 environmental disturbances and exploit new niches. Yet, most urban species maintain a wary  
58 distance with humans, showing flight response to human approach and close interactions  
59 (Carrete and Tella, 2011; Møller A, 2008; Rodewald and Shustack, 2008). Studies on several  
60 urban adapted mammals have shown that though they scavenge in human settlements, they  
61 prefer to den away from humans, avoiding human proximity during whelping (Ross et al., 2010;  
62 Theuerkauf and Jedrzejewski, 2002; Ye et al., 2007) .The dog (*Canis lupus familiaris*) has shared  
63 space and coevolved with humans for centuries, being the first ever species to be domesticated  
64 by humans (Clutton-Brock, 1995) .Though the domestic dog is mostly recognized as pets, free-  
65 ranging dogs comprise almost 80% of the world's dog population (Boitani and Ciucci, 1995;

66 Hughes and Macdonald, 2013), and are an integral part of the human environment in most  
67 developing countries (Vanak and Gompper, 2009). They experience differing levels of human  
68 interactions, both positive and negative (Bhattacharjee et al, *In Press*), and are largely dependent  
69 on human generated wastes for their sustenance (Majumder et al., 2014). Free-ranging dogs are  
70 not under direct human supervision (Cafazzo et al., 2010; Majumder et al., 2014; Vanak and  
71 Gompper, 2009), but have adapted to living in close proximity with humans as commensals.  
72 They are also considered to be reservoirs of various zoonotic diseases including rabies and hence  
73 a threat to both humans and wildlife (Butler et al., 2004; Fekadu, 1982). Moreover, they scatter  
74 garbage, defecate in open spaces and disturb people by their nocturnal barking. Hence they are  
75 considered to be a nuisance by a part of the human population, though they are often cared for by  
76 some. It is likely that their experiences of interactions with humans influence their behaviour to  
77 some extent, determining their perception of humans in general.

78 In India, free-ranging dogs have existed as a continuous population for centuries (Thapar R,  
79 1990). They have a ubiquitous presence from remote villages to metropolitan areas. They are  
80 primarily scavengers, but are known to hunt in packs in the fringes of human habitations too  
81 (Kumar and Paliwal, 2015; Young et al., 2011). They live in stable social packs that show  
82 interesting cooperation-conflict dynamics, especially over pup rearing (Majumder et al., 2014;  
83 Paul and Bhadra, 2017; Paul et al., 2014; Paul et al., 2015). Early life mortality is very high in  
84 spite of extensive parental and alloparental care, with only 19% of the pups reaching adulthood  
85 (Paul et al., 2016). 63% of this mortality is human induced, and yet, the free-ranging dogs do not  
86 avoid human proximity during whelping, but often use spaces within human habitations as dens  
87 (Sen Majumder et al., 2016). They show plasticity in their interactions with humans; pups readily  
88 follow human pointing gestures, but juveniles tend not to do so. Adults use reliability cues to

89 adjust their responses to human pointing and are good at retrieving food from human artefacts  
90 like closed garbage bags (Bhattacharjee et al, *In press*). Humans are thus a source of food and  
91 shelter but also responsible for mortality of the free-ranging dogs, and thus it is imperative for  
92 the dogs to assess the intentions of humans before interacting with them. It has been suggested  
93 that canines have a predisposition to attend to the actions of their social companions, provided  
94 they must learn to recognize humans as companions and understand the relationship through  
95 learning and experience (Reid, 2009). Moreover, social attachment with humans is considered to  
96 have been a key factor in dog domestication (Nagasawa et al., 2015). Thus, understanding the  
97 ability of the free-ranging dogs to establish a social connection with unfamiliar humans can help  
98 to shed light on the domestication process. Here we investigate the dog – human relationship in  
99 the context of food and social rewards in urban environment.

100 A study by Feuerbacher and Wynne (2012) concluded no effect of a brief social reward on pet  
101 and shelter dogs as compared to food reward (Feuerbacher and Wynne, 2012), but contextual  
102 differences might play a determining role in case of the free-ranging dogs. Another study showed  
103 pet dogs' tendency to prefer food to petting; but petting seemed to be important when it was  
104 compared with vocal praise (Feuerbacher and Wynne, 2014). Hence, without considering the  
105 effect of different environmental conditions and life experiences, direct comparison of outcomes  
106 from pet dogs with the free-ranging dogs would not be valid. We conducted field trials on free-  
107 ranging dogs to test the effect of food and social rewards on their tendency to make contact with  
108 unfamiliar humans. Our experiments comprised of both one-off trials with brief exposure of  
109 social petting, as well as long-term repeated trials for both kinds of rewards. We provided dogs  
110 with a choice to obtain food from either a human hand or the ground. Since free-ranging dogs are  
111 scavengers, and they also receive negative interactions from humans, we hypothesized that they

112 would prefer to take food from the ground, rather from the experimenter's hand. We expected  
113 that the immediate social reward would increase the dogs' tendency to take food from the hand.  
114 However, since pet dogs respond more to food than to petting, we expected the free-ranging dogs  
115 to show an increased tendency to feed from the hand on being provided with long term food,  
116 rather than social rewards.

117

## 118 **Materials and methods**

### 119 **Subjects and study area**

120 We tested a total of 103 adult free-ranging dogs located randomly in different urban areas -  
121 Mohanpur (22°56'49''N and 88°32'4''E), Kalyani (22°58'30''N, 88°26'04''E) and Kolkata  
122 (22°57'26''N, 88°36'39''E), West Bengal, India. Sexes of the dogs were determined by looking  
123 at their genitals. All individuals were photographed for record and tracking purpose. The  
124 individuals were tracked for the long term experiments using their location and morphological  
125 features like coat colour, patch patterns and any other distinguishing features in the body.

### 126 **Experimental procedure**

#### 127 **(i)One off Test**

128 We used 30 random adult individual dogs to test their tendency to approach unfamiliar humans  
129 for food. A single piece of raw chicken weighing approximately 10-15 gm was used as the food  
130 reward. In trial 1, the experimenter (E) placed a food reward on the palm of his hand (hand  
131 chosen randomly) and held it open close to the ground, at a height of 5-10 cm. He placed another  
132 similar piece of raw chicken at the same time, but on the ground in front of him, such that there

133 was a distance of 0.6 m between the two reward options. The set-up was designed such that both  
134 the reward options were equally accessible to the dog (Supplementary Information 1: Fig S1,  
135 Video S1). E tried to attract the attention of an individual dog using sounds that are typically  
136 used to call out to dogs on streets in India (Supplementary Information 2: Video S2) for 1-2 sec,  
137 from an approximate distance of 4 ft. Since these dogs were not on leash, we tried to ensure that  
138 the distance remained roughly the same before recording the trials. The response of the dog was  
139 video recorded for 1 min or till an individual made a choice, whichever was earlier. E kept  
140 gazing at the dog throughout the trial, and the same person carried out all the trials. After  
141 completion of trial 1, E provided the dog with a social reward by petting 3 times on its head.  
142 After an interval of 5-10 seconds, trial 2 was run, where the individuals again had to make a  
143 choice from the same set up as in trial 1.

144 The control trials were exactly the same as the test trials but here, E did not provide any social  
145 reward in between trials 1 and 2. A separate set of 30 adult dogs were tested in this condition.

#### 146 **(ii) Long term test**

147 A total of 43 adult dogs different from the one-off test and control conditions were randomly  
148 selected from diverse locations for a long term experiment in order to investigate the effect of  
149 learning in the context of food and social rewards. From this set of 43 individuals, two subsets  
150 were randomly generated; 21 individuals for food and 22 individuals for social rewards. Each  
151 dog was tested a total of six times, at increasing intervals of 1, 2, 3, 4 and 5 days. Thus, for every  
152 dog, the experiment commenced on Day 0, and was conducted on Days 1, 3, 6, 10 and 15  
153 respectively. Unlike the previous two conditions, in this case, only trial 1 was run, keeping the  
154 protocol constant. Additional food (one piece of chicken) or social (petting thrice on the head)

155 rewards were provided by E, 1 min before the trial, to the respective subsets of dogs except on  
156 Day 0. On Day 0, no additional food or social reward was provided, such that this represented  
157 the response of the naïve dogs to E.

## 158 **Data analysis**

159 All the videos were coded by a single experimenter different from E, and the data was used for  
160 further analysis. We used Shapiro-Wilk tests to check for normality of our data and found them  
161 to be not normally distributed, thus we performed non-parametric tests.

162 We considered all the “naïve” responses - trial 1 of the one off-test and control conditions and  
163 the Day 0 responses of long term observations in order to investigate the population level  
164 tendency of free-ranging dogs to make attachment with humans for food. We compared the  
165 number of dogs that obtained food from the ground and human hand using Goodness of Fit Chi-  
166 square test. We defined latency as the time interval between catching the attention of an  
167 individual and its approach to either of the options provided. We compared latencies of the dogs  
168 that obtained food from the ground and from the hand using Mann Whitney U test. We identified  
169 the sexes of the dogs and compared the response of the two sexes in obtaining food rewards  
170 using Contingency chi-square test. We calculated all possible combinations (hand-hand, ground-  
171 hand, ground-ground and hand-ground) of obtaining food reward by dogs between trial 1 and 2  
172 of both test and control conditions. Hand – hand and ground – ground situations were considered  
173 as “no change” and hand – ground and ground –hand situations as “change”. We then compared  
174 change and no change categories for both test and control trials by using goodness of fit chi-  
175 square tests. We compared latencies of dogs between trial 1 and 2 for both the test and control  
176 conditions using Wilcoxon paired-sample tests.



177 We built a socialization index based on the vigour of tail wagging and gazing at different food  
178 reward options by the dogs (Table 1). Tail wagging by free-ranging dogs establish an affirmative  
179 association with humans and indicative of positive social bond. Gazing or alternation of gaze  
180 indicate dogs' hesitant nature to approach any of the food options. Scores were assigned in such  
181 a way that an individual could have a maximum index value of 8 by showing rapid tail wagging  
182 and no gazing at all.

183 **Table 1. Socialization index incorporating the behaviours shown by dogs and**  
184 **corresponding scores.** Socialization index was built based on tail wagging and gazing  
185 behaviour. Definitions of different types of tail wagging and gazing behaviours and their  
186 corresponding scores within a range of 1 to 4 provided.

| <b>Tail Wagging</b>                           |              | <b>Gazing</b>                |              |
|-----------------------------------------------|--------------|------------------------------|--------------|
| <b>Type</b>                                   | <b>Score</b> | <b>Type</b>                  | <b>Score</b> |
| Rapid (tail wagging along with back movement) | 4            | No                           | 4            |
| Fast (without back movement)                  | 3            | At hand food                 | 3            |
| Slow                                          | 2            | At both hand and ground food | 2            |
| No                                            | 1            | At ground food               | 1            |

187  
188 We compared the index values of individuals across the two trials for both test and control  
189 conditions using Wilcoxon paired-sample tests. Generalized linear mixed models (GLMM) with  
190 binomial distributions were used to check any effect of day intervals, latencies, and socialization

191 index values over dogs' preference for obtaining food reward from either hand or ground in  
192 long-term experiments.

193 Separate models (GLMM) were built for the two different conditions where additional food and  
194 social rewards were provided. Identity of individuals was included as a random effect on the  
195 intercept. We used AIC values for comparison in order to get the best-fitting models. We  
196 determined consistency of individuals obtaining food reward from hand and ground at 100% and  
197 80% levels for both the long-term experiments. Similarly, overall inconsistency was calculated  
198 where dogs changed their preference on every alternate day interval.

199 A second coder naïve to the purpose of the study coded 20% of the data to check inter-rater  
200 reliability. It was perfect food preference (cohen's kappa = 1.00) and socialization index building  
201 (cohen's kappa = 1.00) and almost perfect for latency (cohen's kappa = 0.95). The alpha level  
202 was 0.05 throughout the analysis. GLMMs were performed using "lme4" package of R Studio (R  
203 Development Core Team, 2015). Along with R, other statistical analyses were performed using  
204 StatistiXL version 1.11.0.0.

## 205 **Results**

### 206 **(i) Attachment of dogs to humans**

207 Considering the "naïve" responses of all 103 individuals, 37% obtained food reward from the  
208 human hand and 63% from the ground, thereby showing a bias against making physical contact  
209 with E (Goodness of fit;  $\chi^2 = 7.078$ ,  $df = 1$ ,  $p = 0.008$ , Fig 1).

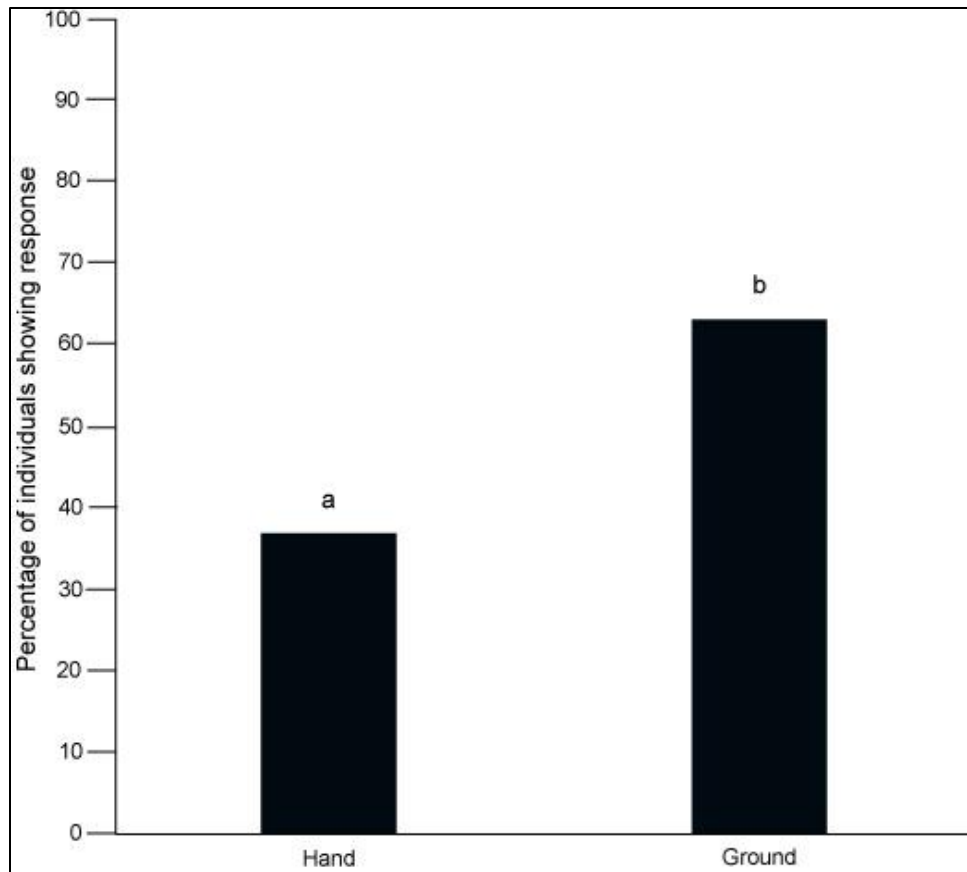

210

211 **Fig 1. Bar graph showing percentage of individuals that obtained food reward from human**  
212 **hand and ground out of all naïve responses.** Dogs showed a significantly higher tendency to  
213 obtain the reward from the ground (Goodness of fit;  $\chi^2 = 7.078$ ,  $p = 0.008$ ). “a” and “b” indicate  
214 significant differences between the categories.

215 However, we did not see any difference in latencies to approach between the responders who  
216 showed different choices (Mann Whitney U test;  $U = 1301.00$ ,  $df1 = 38$ ,  $df2 = 65$ ,  $p = 0.65$ ),  
217 which suggests that the final choice did not influence the time taken to reach a decision to  
218 respond. The two sexes were comparable in their preference to obtain food from either the hand  
219 or the ground (Contingency  $\chi^2$ ;  $\chi^2 = 1.573$ ,  $df = 1$ ,  $p = 0.21$ ).

220

## 221 Effect of immediate social reward/petting

222 We found that in the one-off test, 73% and 83% of the individuals showed “no change” in their  
223 response in trial 2 for the test and control conditions respectively. For both the conditions,  
224 proportion of “no change” responses were significantly higher than “change” (Test - Goodness  
225 of fit;  $\chi^2 = 6.533$ ,  $df = 1$ ,  $p = 0.01$ : Control -  $\chi^2 = 13.333$ ,  $df = 1$ ,  $p < 0.001$ ), suggesting no effect  
226 of immediate social reward (Fig 2).

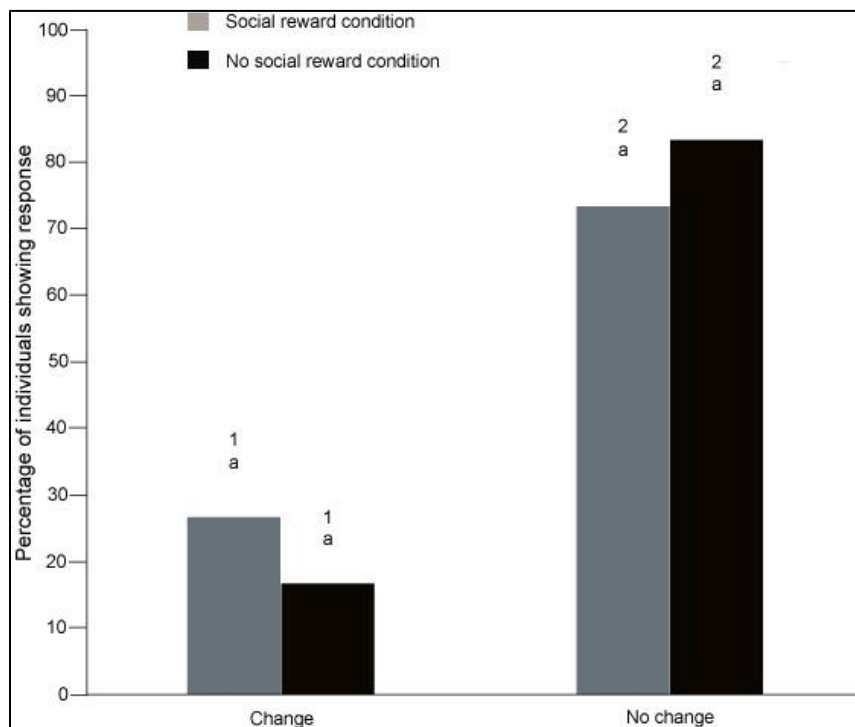

227

228 **Fig 2. Bar graph illustrating percentage of individuals showing “change” and “no change”**  
229 **responses for preference of food reward in the 2<sup>nd</sup> trials of test and control conditions. “No**  
230 **change” indicates same preference of obtaining food in trials 1 and 2 (Hand – Hand, Ground -**  
231 **Ground). Change indicates a change or switch in preference from trial 1 to trial 2 (Hand –**  
232 **Ground, Ground - Hand). Grey bars indicate responses in the test (social reward) condition and**  
233 **black bars indicate responses in the control (no social reward) condition. Letter “a” indicates no**

234 significant differences within the categories (within change and within no change). “1” and “2”  
235 indicate significant differences between the categories (between change and no change).

236

237 Interestingly, we found faster approach by dogs to the set-up in trial 2 for the test condition; thus,  
238 the latency significantly decreased when social reward was provided (Wilcoxon paired-sample  
239 test;  $T = 86.00$ ,  $N = 30$ ,  $p = 0.004$ ), but it remained unchanged in the control condition, when no  
240 social reward was provided (Wilcoxon paired-sample test;  $T = 166.500$ ,  $N = 30$ ,  $p = 0.427$ , Fig  
241 3). Since separate sets of individuals were present for the test and control conditions, we  
242 compared the latencies of 1<sup>st</sup> trials and 2<sup>nd</sup> trials between test and control conditions. We found  
243 no difference for the 1<sup>st</sup> trial latencies of the two conditions (Mann Whitney U test;  $U = 480.00$ ,  
244  $df = 30$ ,  $df = 30$ ,  $p = 0.66$ ), but noticed a significant difference between the 2<sup>nd</sup> trial latencies  
245 (Mann Whitney U test;  $U = 584.500$ ,  $df = 30$ ,  $df = 30$ ,  $p = 0.04$ ). These results suggest that the  
246 dogs might be prone to showing a stronger response to humans when they receive positive social  
247 interactions. However, we did not find any difference in socialization index values between 1<sup>st</sup>  
248 and 2<sup>nd</sup> trials for both test (Wilcoxon paired-sample test;  $T = 73.500$ ,  $N = 30$ ,  $p = 0.14$ ) and  
249 control conditions (Wilcoxon paired-sample test;  $T = 111.500$ ,  $N = 30$ ,  $p = 0.20$ ).

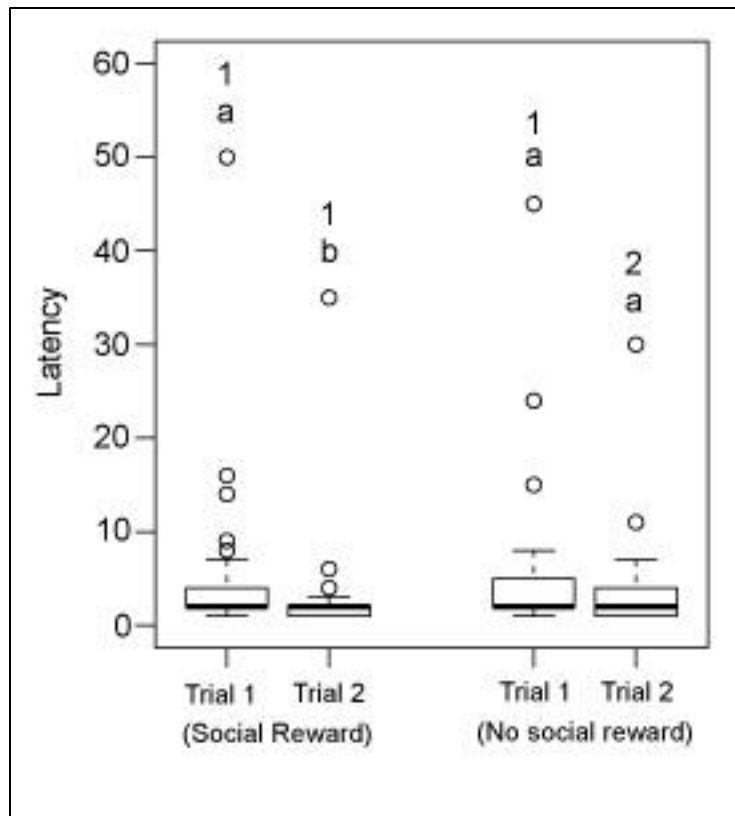

250

251 **Fig 3. Box and whiskers plot showing the latency to approach the set-up.** Dogs showed  
252 significant difference in latency between 1<sup>st</sup> and 2<sup>nd</sup> trials for the test (social reward) condition.  
253 Latency remained comparable between 1<sup>st</sup> and 2<sup>nd</sup> trials in the control (no social reward)  
254 condition. Boxes represent interquartile range, horizontal bars within boxes indicate median  
255 values, and whiskers represent the upper range of the data. “a” and “b” indicate significant  
256 differences within the categories (within social reward and within no social reward). “1” and “2”  
257 indicate significant differences between the categories (between social and no social reward).

258

259 **Effect of long-term social and additional food rewards**

260 Based on AIC values, the best-fitting model depicted socialization index to be the only  
261 significant predictor for dogs' preference of obtaining food in case of the long-term experiment  
262 with additional food reward (Fig 4, Supplementary Information 3). On the other hand, we found  
263 socialization index, latency and time intervals as significant predictors affecting the response for  
264 the long-term experiment with social rewards (Fig 5, Supplementary Information 4). In the long-  
265 term additional food reward experiment, 11 out of 21 individuals (52%) were 100% consistent  
266 for obtaining food reward from the ground, whereas only a single individual consistently  
267 obtained food from the hand (Goodness of fit;  $\chi^2 = 8.333$ ,  $df = 1$ ,  $p = 0.004$ , Fig 6). In the long-  
268 term social reward experiment, 3 out of 22 (14%) and 8 out of 22 (36%) individuals showed  
269 100% consistency at obtaining food from ground and hand respectively (Goodness of fit;  $\chi^2 =$   
270  $2.273$ ,  $df = 1$ ,  $p = 0.13$ , Fig 7). We found a difference in the 100% consistency levels of  
271 obtaining food from hand and ground between social and additional food reward conditions  
272 (Contingency chi-square;  $\chi^2 = 9.991$ ,  $df = 1$ ,  $p = 0.002$ ). At 80% consistency level, 3 out of 21  
273 (14%) and 1 out of 21 (5%) individuals obtained food reward from hand and ground (Goodness  
274 of fit;  $\chi^2 = 1.000$ ,  $df = 1$ ,  $p = 0.32$ ) respectively for additional food reward condition; whereas,  
275 none of the individuals from social reward condition showed 80% consistency. 1 out of 21  
276 individuals for additional food and 1 out of 22 individuals for social reward condition changed  
277 their responses on every alternate day of the experiment, thereby showing inconsistency.

278

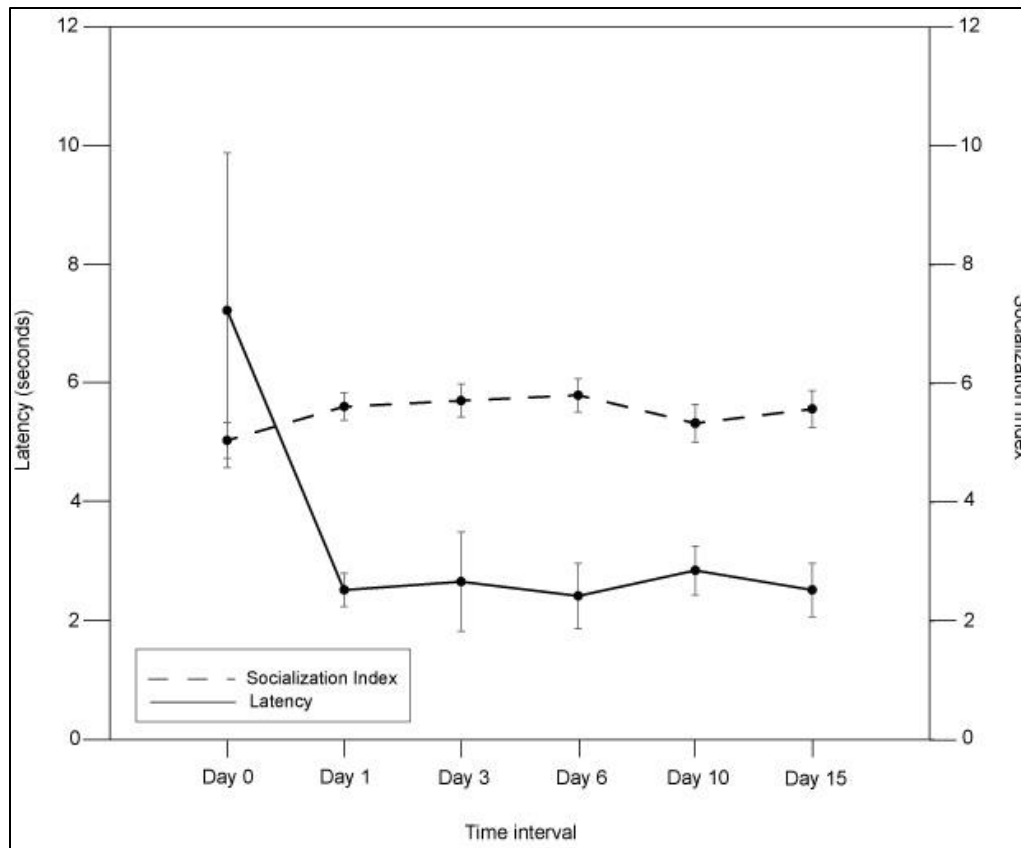

279

280 **Fig 4. Average latency and socialization index values ( $\pm$  SE) at different intervals (in days)**

281 **for long-term additional food reward condition.** The primary y-axis depicts latency and

282 secondary y-axis depicts socialization index with x-axis showing the specific time interval. The

283 solid line indicates latency and the dashed line indicates socialization index.

284



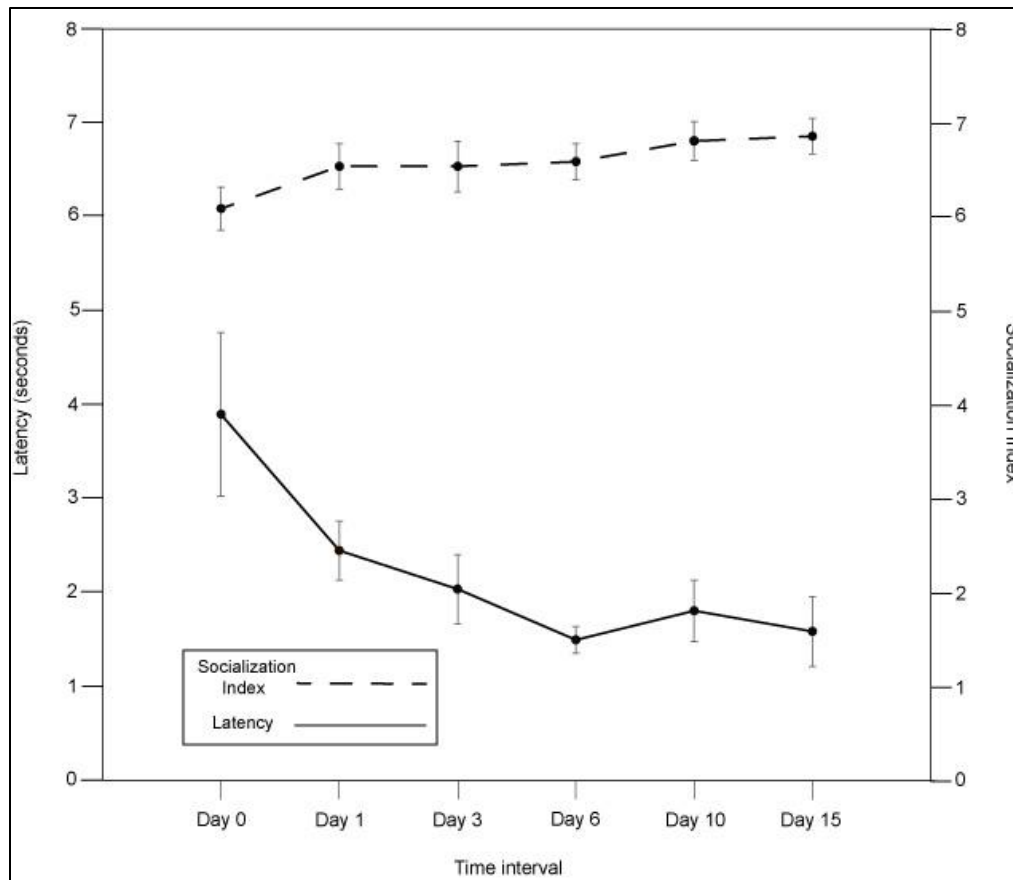

285

286 **Fig 5. Average latency and socialization index values ( $\pm$  SE) at the day intervals for long-**  
287 **term social reward condition.** The primary y-axis depicts latency and secondary y-axis depicts  
288 socialization index with the x-axis showing the specific time interval. The solid line indicates  
289 latency and dashed line indicates socialization index.

290

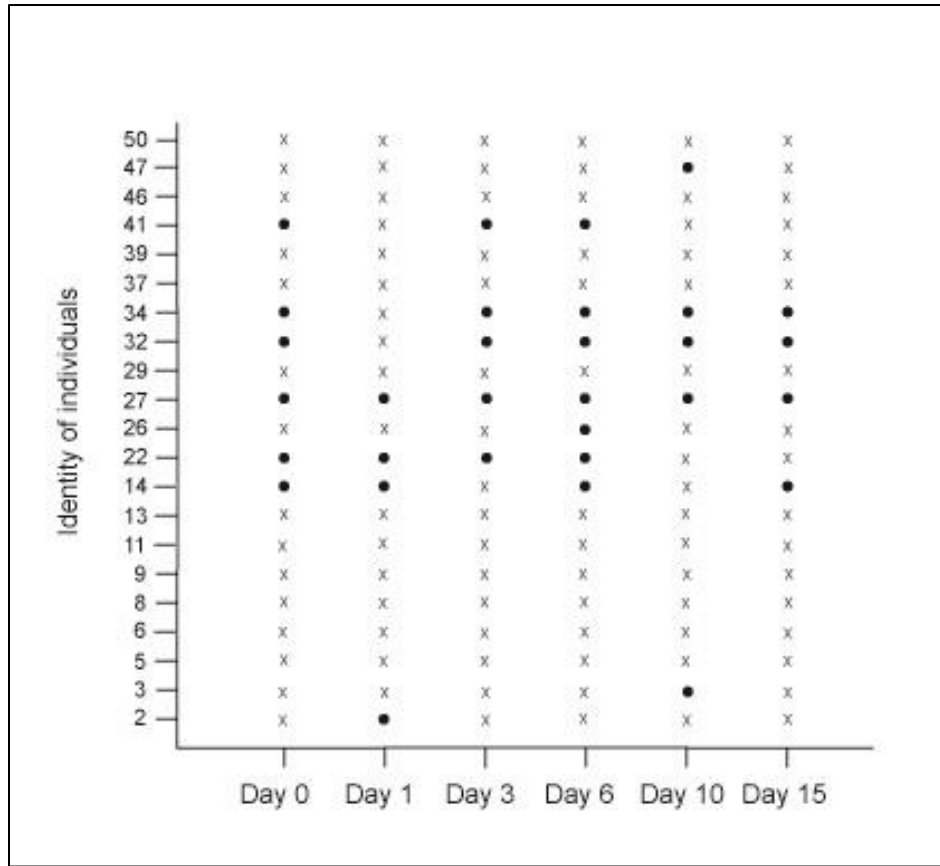

291

292 **Fig 6. Identity of individuals and their preference of obtaining reward at specific day**  
293 **intervals for the long-term additional food reward condition.** The solid dots indicate  
294 obtaining food from hand and the crosses indicate obtaining food from ground. Day 0 responses  
295 are naïve as dogs had no previous exposure to additional food reward.

296

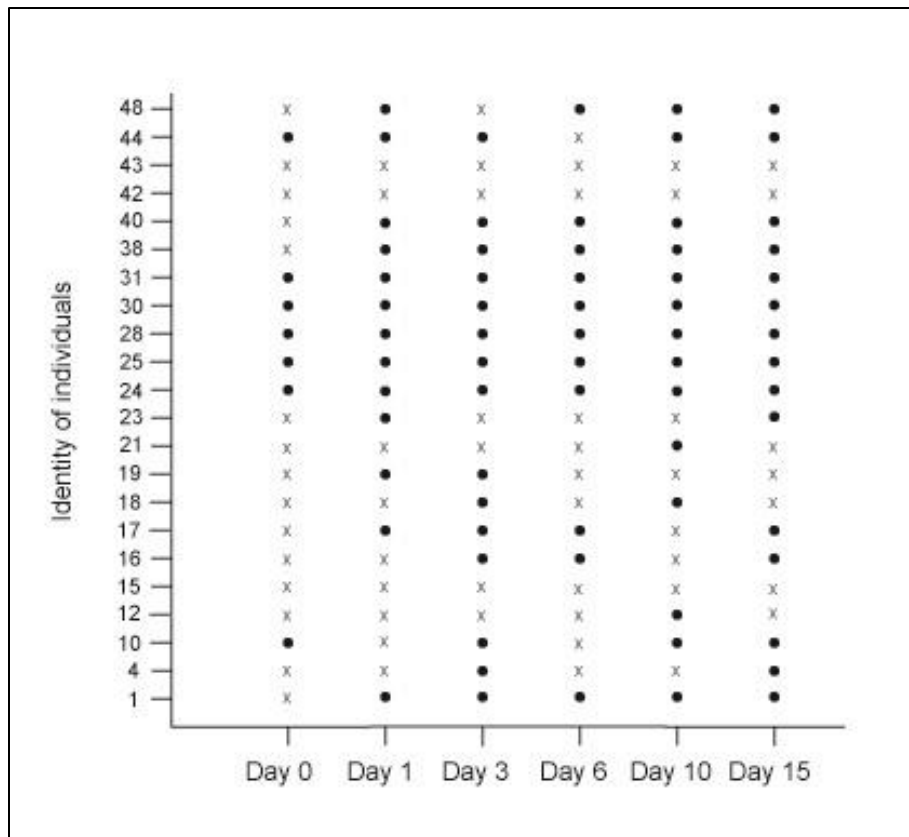

297

298 **Fig 7. Identity of individuals and their preference of obtaining reward at specific day**  
299 **intervals for the long-term social reward condition.** The solid dots indicate obtaining food  
300 from hand and the crosses indicate obtaining food from ground. Day 0 responses are naïve as  
301 dogs had no previous exposure to social reward.

302

### 303 **Discussion**

304 Free-ranging dogs demonstrated a bias against making physical contact with unfamiliar humans,  
305 as suggested by the higher proportion of individuals opting to take the food from the ground,  
306 validating our hypothesis. In the one-off test, dogs elicited a significantly faster response  
307 (reduced latency) or an increased tendency to approach the set-up when the social reward was

308 provided. However, contrary to our expectations, a single positive feedback in terms of social  
309 reward did not prove to be substantial in establishing trust in the unfamiliar human. Moreover, it  
310 did not translate into an increased tendency to interact with the experimenter as there was no  
311 change in the socialization index between consecutive trials when the social reward was  
312 provided. The one-off experiments thereby reinforce the idea that free-ranging dogs are generally  
313 wary of humans (Bhattacharjee et al, *In press*), and prefer not to make physical contact with  
314 unfamiliar humans, even after receiving brief positive reinforcement through food or social  
315 rewards.

316 The long-term experiments provided an interesting insight into the free-ranging dogs'  
317 relationship with humans, which was very different from our hypothesis based on the results  
318 obtained with pet dogs in the past(Feuerbacher and Wynne, 2012)<sup>38</sup>. Long-term provisioning of  
319 additional food reward increased the socialization index values of dogs who obtained food  
320 reward from the human hand. However, there was no significant reduction in the latency to  
321 respond, which suggests that the dogs were hesitant to make direct contact with humans, despite  
322 increasing familiarity and positive reinforcement with additional food reward. The most striking  
323 observation was the change in the dogs' response to the experimenter in the presence of the long-  
324 term social reward. Dogs exposed to the social reward showed reduced latency (thus increased  
325 interest) to approach the experimenter and an increase in the socialization index. Moreover, the  
326 dogs' preference to feed from the human hand increased with increased exposure to the social  
327 reward. The high degree of consistency shown by the dogs in obtaining food from the ground in  
328 the additional food reward condition further validates their predisposition to avoid physical  
329 contact with unfamiliar humans. In contrast, higher number of dogs showed 100% consistency in  
330 preferentially taking food from the human hand in the social reward condition. To summarize,

331 long-term social reward, but not food reward, impacted the dogs' tendency to make physical  
332 contact with humans, which suggests that social reward is more effective in building trust  
333 between dogs and unfamiliar humans than food rewards.

334 A recent study concluded that domestication has been a key factor contributing to dogs' ability  
335 of visual and physical contact with humans (Nagasawa et al., 2015). It has been suggested that  
336 short-term sensory interactions between pet dogs and their owners influence hormonal levels  
337 (e.g. oxytocin) and heart rate (Handlin et al., 2011). Rising levels of oxytocin in dogs help to  
338 maintain their social orientation, affiliation and gazing toward their owners (Nagasawa et al.,  
339 2015; Romero et al., 2014), and gazing towards dogs increases the oxytocin levels in their  
340 owners, which in turn induces a rise in oxytocin in the dogs, thus strengthening the dog-human  
341 bonding (Nagasawa et al., 2015). Though free-ranging dogs tend to avoid direct human contact,  
342 studies have shown that they gaze and even seek help from strangers when faced with an  
343 unfamiliar task (Bhattacharjee et al., 2017). Free-ranging dogs are also known to regularly beg  
344 from humans, using the gazing behaviour (Bhadra and Bhadra, 2014) . They often experience  
345 negative interactions with humans, and their tendency to avoid direct physical contact with  
346 unfamiliar humans could be a possible outcome of cumulative negative experiences. In our  
347 experiment with the long-term additional reward conditions, the dogs preferred to avoid contact  
348 when the experimenter provided additional food reward. However, long term social reward  
349 increased the dogs' tendency to make physical contact with the experimenter. In their day-to-day  
350 lives, the free-ranging dogs routinely encounter unfamiliar humans, and the ability to assess  
351 human intentions could be highly adaptive under such circumstances. They are often lured with  
352 food and then beaten up or even poisoned by people (Paul et al., 2016) and hence, relying on  
353 strangers who offer food might have negative consequences for dogs. On the other hand, people

354 who show affection to the dogs are less likely to harm them, and relying on such humans might  
355 indeed be advantageous.

356 In an earlier study, we have observed pups to readily follow human pointing, while juveniles and  
357 adults fail to do so. Interestingly, adults adjust their reliability on the experimenter based on  
358 immediate experience, choosing to follow pointing on positive reinforcement and refusing to  
359 follow pointing on negative reinforcement (Bhattacharjee et al. *In Press*). Thus, the free-ranging  
360 dogs show considerable plasticity in their tendency to follow human pointing, learning from  
361 experience through their development. The ability to follow human pointing is considered to be  
362 an important socio-cognitive ability in dogs, and has been suggested to be closely associated  
363 with their domestication (Hare and Tomasello, 2005; Miklósi et al., 2004; Miklösi et al., 1998;  
364 Paul et al., 2016; Soproni et al., 2001). The free-ranging dogs in India live very closely with  
365 humans, in every possible human habitation, and are dependent on humans for their sustenance,  
366 either directly or indirectly (Majumder et al., 2014; Sen Majumder et al., 2016; Vanak and  
367 Gompper, 2009). In contrast to other urban adapted animals, the free-ranging dogs have been  
368 observed to preferentially den close to humans, often within human homes (Sen Majumder et al.,  
369 2016). They interact with familiar as well as unfamiliar humans on a regular basis and receive  
370 both positive and negative interactions from them. During the early stages of domestication,  
371 ancestors of the present-day dogs would have been faced with a similar situation. Human  
372 communities would have acted as a lucrative source of nutrition, but the adventurous individuals  
373 which ventured too close could have been easy prey for the humans. Someone who threw a bone  
374 to a dog could have turned into a hunter in no time, but a human who put out a friendly hand to  
375 pet a dog would have been less likely to attack it. The oxytocin feedback that is known to help  
376 establish bonding between dogs and their owners could have been influential in this trust

377 building phase of the relationship between the two species. We speculate that the tendency of  
378 dogs to rely more on positive social interactions, rather than food as a cue for trust building with  
379 unfamiliar humans could have acted as an important behavioural paradigm in the evolution of the  
380 dog-human relationship.

381

382

383

#### 384 **References**

385 **Alberti, M., Marzluff, J. M., Shulenberger, E., Bradley, G., Ryan, C. and Zumbrunnen, C.**  
386 (2008). Integrating Humans into Ecology: Opportunities and Challenges for Studying Urban  
387 Ecosystems. In *Urban Ecology*, pp. 143–158. Boston, MA: Springer US.

388 **Bhadra, A. and Bhadra, A.** (2014). Preference for meat is not innate in dogs. *J. Ethol.* **32**, 15–  
389 22.

390 **Bhattacharjee, D., Dasgupta, S., Biswas, A., Deheria, J., Gupta, S., Nikhil Dev, N., Udell,**  
391 **M. and Bhadra, A.** (2017). Practice makes perfect: familiarity of task determines success  
392 in solvable tasks for free-ranging dogs (*Canis lupus familiaris*). *Anim. Cogn.* **20**, 771–776.

393 **Boitani, L. and Ciucci, P.** (1995). Comparative social ecology of feral dogs and wolves. *Ethol.*  
394 *Ecol. Evol.* **7**, 49–72.

395 **Butler, J. R. A., Du Toit, J. T. and Bingham, J.** (2004). Free-ranging domestic dogs (*Canis*  
396 *familiaris*) as predators and prey in rural Zimbabwe: Threats of competition and disease to

- 397 large wild carnivores. *Biol. Conserv.* **115**, 369–378.
- 398 **Cafazzo, S., Valsecchi, P., Bonanni, R. and Natoli, E.** (2010). Dominance in relation to age,  
399 sex, and competitive contexts in a group of free-ranging domestic dogs. *Behav. Ecol.* **21**,  
400 443–455.
- 401 **Carrete, M. and Tella, J. L.** (2011). Inter-Individual Variability in Fear of Humans and  
402 Relative Brain Size of the Species Are Related to Contemporary Urban Invasion in Birds.  
403 *PLoS One* **6**, e18859.
- 404 **Castillo, E., Priotto, J., Ambrosio, A. M., Provencal, M. C., Pini, N., Morales, M. A.,**  
405 **Steinmann, A. and Polop, J. J.** (2003). Commensal and wild rodents in an urban area of  
406 Argentina. *Int. Biodeterior. Biodegradation* **52**, 135–141.
- 407 **Clutton-Brock, J.** (1995). Domestication and Evolution. Origins of the dog: Domestication and  
408 early history. In *The Domestic Dog: Its Evolution, Behaviour and Interactions with People*,  
409 pp. 7–50.
- 410 **Ditchkoff, S. S., Saalfeld, S. T. and Gibson, C. J.** (2006). Animal behavior in urban  
411 ecosystems: Modifications due to human-induced stress. *Urban Ecosyst.* **9**, 5–12.
- 412 **Fekadu, M.** (1982). Rabies in Ethiopia. *Am. J. Epidemiol.* **115**, 266–273.
- 413 **Feuerbacher, E. N. and Wynne, C. D. L.** (2012). Relative efficacy of human social interaction  
414 and food as reinforcers for domestic dogs and hand-reared wolves. *J. Exp. Anal. Behav.* **98**,  
415 105–29.
- 416 **Feuerbacher, E. N. and Wynne, C. D. L.** (2014). Most domestic dogs (*Canis lupus familiaris*)  
417 prefer food to petting: Population, context, and schedule effects in concurrent choice. *J.*



- 418 *Exp. Anal. Behav.* **101**, 385–405.
- 419 **Grimm, N. B., Faeth, S. H., Golubiewski, N. E., Redman, C. L., Wu, J., Bai, X. and Briggs,**  
420 **J. M.** (2008). Global Change and the Ecology of Cities. *Science* (80-. ). **319**, 756–760.
- 421 **Handlin, L., Hydbring-Sandberg, E., Nilsson, A., Ejdeb?ck, M., Jansson, A. and Uvn?s-**  
422 **Moberg, K.** (2011). Short-Term Interaction between Dogs and Their Owners: Effects on  
423 Oxytocin, Cortisol, Insulin and Heart Rate?An Exploratory Study. *Anthrozoos A*  
424 *Multidiscip. J. Interact. People Anim.* **24**, 301–315.
- 425 **Hare, B. and Tomasello, M.** (2005). Human-like social skills in dogs? *Trends Cogn. Sci.* **9**,  
426 439–444.
- 427 **Hughes, J. and Macdonald, D. W.** (2013). A review of the interactions between free-roaming  
428 domestic dogs and wildlife. *Biol. Conserv.* **157**, 341–351.
- 429 **Kumar, A. and Paliwal, R.** (2015). Feral dogs of Spiti Valley, Himachal Pradesh: An emerging  
430 threat for wildlife and human life. *Curr. Sci.* **108**, 1799–1800.
- 431 **Liz?e, M.-H., Mauffrey, J.-F., Tatoni, T. and Deschamps-Cottin, M.** (2011). Monitoring  
432 urban environments on the basis of biological traits. *Ecol. Indic.* **11**, 353–361.
- 433 **Majumder, S. Sen, Bhadra, A., Ghosh, A., Mitra, S., Bhattacharjee, D., Chatterjee, J.,**  
434 **Nandi, A. K. and Bhadra, A.** (2014). To be or not to be social: Foraging associations of  
435 free-ranging dogs in an urban ecosystem. *Acta Ethol.* **17**, 1–8.
- 436 **Maklakov, A. A., Immler, S., Gonzalez-Voyer, A., Ronn, J. and Kolm, N.** (2011). Brains and  
437 the city: big-brained passerine birds succeed in urban environments. *Biol. Lett.* **7**, 730–732.

- 438 **Mcintyre, N. E. and Hope, D.** (2008). Urban Ecology as an Interdisciplinary Field : Differences  
439 in the use of “ Urban ” Between the Social and Natural Sciences. *Urban Ecol.* 49–65.
- 440 **Miklósi, Á., Topál, J. and Csányi, V.** (2004). Comparative social cognition: what can dogs  
441 teach us? *Anim. Behav.* **67**, 995–1004.
- 442 **Miklósi, Á., Polgárdi, R., Topál, J. and Csányi, V.** (1998). Use of experimenter-given cues in  
443 dogs. *Anim. Cogn.* **1**, 113–121.
- 444 **Møller A, A. P.** (2008). Flight distance of urban birds, predation, and selection for urban life.  
445 *Behav. Ecol. Sociobiol.* **63**, 63–75.
- 446 **Nagasawa, M., Mitsui, S., En, S., Ohtani, N., Ohta, M., Sakuma, Y., Onaka, T., Mogi, K.**  
447 **and Kikusui, T.** (2015). Oxytocin-gaze positive loop and the coevolution of human-dog  
448 bonds. *Science (80-. ).* **348**, 333–336.
- 449 **Paul, M. and Bhadra, A.** (2017). Selfish Pups: Weaning Conflict and Milk Theft in Free-  
450 Ranging Dogs. *PLoS One* **12**, e0170590.
- 451 **Paul, M., Majumder, S. Sen and Bhadra, A.** (2014). Selfish mothers? An empirical test of  
452 parent-offspring conflict over extended parental care. *Behav. Processes* **103**, 17–22.
- 453 **Paul, M., Majumder, S. Sen, Nandi, A. K. and Bhadra, A.** (2015). Selfish mothers indeed!  
454 Resource-dependent conflict over extended parental care in free-ranging dogs. *R. Soc. Open*  
455 *Sci.* **2**, 150580.
- 456 **Paul, M., Sen Majumder, S., Sau, S., Nandi, A. K. and Bhadra, A.** (2016). High early life  
457 mortality in free-ranging dogs is largely influenced by humans. *Sci. Rep.* **6**, 19641.

- 458 **Pickett, S. T. A., Cadenasso, M. L., Grove, J. M., Nilon, C. H., Pouyat, R. V., Zipperer, W.**  
459 **C. and Costanza, R.** (2008). Urban Ecological Systems: Linking Terrestrial Ecological,  
460 Physical, and Socioeconomic Components of Metropolitan Areas. In *Urban Ecology*, pp.  
461 99–122. Boston, MA: Springer US.
- 462 **Pocock, M. J. O., Searle, J. B. and White, P. C. L.** (2004). Adaptations of animals to  
463 commensal habitats: population dynamics of house mice *Mus musculus domesticus* on  
464 farms. *J. Anim. Ecol.* **73**, 878–888.
- 465 **R Development Core Team** (2015). R: A language and environment for statistical computing. R  
466 Foundation for Statistical Computing, Vienna, Austria. URL <http://www.R-project.org/>. *R*  
467 *Found. Stat. Comput. Vienna, Austria*.
- 468 **Reid, P. J.** (2009). Adapting to the human world: Dogs' responsiveness to our social cues.  
469 *Behav. Processes* **80**, 325–333.
- 470 **Rodewald, A. D. and Shustack, D. P.** (2008). Urban flight: understanding individual and  
471 population-level responses of Nearctic-Neotropical migratory birds to urbanization. *J. Anim.*  
472 *Ecol.* **77**, 83–91.
- 473 **Romero, T., Nagasawa, M., Mogi, K., Hasegawa, T. and Kikusui, T.** (2014). Oxytocin  
474 promotes social bonding in dogs. *Proc. Natl. Acad. Sci.* **111**, 9085–9090.
- 475 **Ross, S., Kamnitzer, R., Munkhtsog, B. and Harris, S.** (2010). Den-site selection is critical for  
476 Pallas's cats (*Otocolobus manul*). *Can. J. Zool.* **88**, 905–913.
- 477 **Sen Majumder, S., Paul, M., Sau, S. and Bhadra, A.** (2016). Denning habits of free-ranging  
478 dogs reveal preference for human proximity. *Sci. Rep.* **6**, 32014.

- 479 **Shochat, E., Warren, P. S., Faeth, S. H., McIntyre, N. E. and Hope, D.** (2006). From patterns  
480 to emerging processes in mechanistic urban ecology. *Trends Ecol. Evol.* **21**, 186–91.
- 481 **Soproni, K., Miklósi, A., Topál, J. and Csányi, V.** (2001). Comprehension of human  
482 communicative signs in pet dogs (*Canis familiaris*). *J. Comp. Psychol.* **115**, 122–126.
- 483 **Thapar R** (1990). *A history of India*. Pengun UK.
- 484 **Theuerkauf, J. and Jedrzejewski, W.** (2002). Accuracy of Radiotelemetry to Estimate Wolf  
485 Activity and Locations. *J. Wildl. Manage.* **66**, 859.
- 486 **Vanak, A. T. and Gompper, M. E.** (2009). Dietary Niche Separation Between Sympatric Free-  
487 Ranging Domestic Dogs and Indian Foxes in Central India. *J. Mammal.* **90**, 1058–1065.
- 488 **Vannier-Santos, M. A. and Lenzi, H. L.** (2011). Parasites or Cohabitants: Cruel Omnipresent  
489 Usurpers or Creative “Éminences Grises”? *J. Parasitol. Res.* **2011**, 1–19.
- 490 **White, J. G., Antos, M. J., Fitzsimons, J. A. and Palmer, G. C.** (2005). Non-uniform bird  
491 assemblages in urban environments: the influence of streetscape vegetation. *Landsc. Urban*  
492 *Plan.* **71**, 123–135.
- 493 **Ye, X., Yong, Y., Yu, C. and Zhang, Z.** (2007). Den selection by the giant panda in Foping  
494 Nature Reserve, China. *J. Nat. Hist.* **41**, 2529–2536.
- 495 **Young, J. K., Olson, K. A., Reading, R. P., Amgalanbaatar, S. and Berger, J.** (2011). Is  
496 Wildlife Going to the Dogs? Impacts of Feral and Free-roaming Dogs on Wildlife  
497 Populations. *Bioscience* **61**, 125–132.
- 498

499 **Acknowledgements**

500 The authors thank Mr. Susnata Karmakar, IISER Kolkata, for lending his vehicle for use during  
501 the field experiments.

502

503 **Author contributions**

504 DB, SS, JD carried out the field experiments, SS was the constant Experimenter throughout the  
505 work. DB coded the videos and analyzed the data. AB and DB designed the protocol. AB  
506 supervised the work and co-wrote the paper with DB.

507

508 **Competing interests**

509 Authors declare no competing interests.

510
